# Supplementary material
Source: publisher figshare collection journal article supplement (https://tandf.figshare.com/ndownloader/files/12810173)
Supplement: Supplementary file 1 [file 12810173]

**Figure S1** Meteorological data (2013-2014 and 2014-2015) of Pindibhatian district Hafizabad.

**Table S1** Protein, glucose and organic matter obtained from the root powder of selected halophytes roots. Results are mean of four replicates

| Plant species | Protein (mg/g) | Glucose (mg/g) | Organic matter (%) |
| --- | --- | --- | --- |
| *Conyzanthus saqumatus* | 19.46C (±1.22) | 33.13B (±2.11) | 64.14AB (±3.44) |
| *Solanum surattense* | 21.23B (±1.45) | 28.98C (±2.02) | 52.12B (±3.09) |
| *Cenchrus ciliaris* | 29.31A (±1.33) | 41.24A (±1.78) | 77.16A (±3.22) |
| *Aerva javanica* | 16.95D (±1.01) | 30.23BC (±1.33) | 64.33AB (±2.25) |
| *Peganum harmala* | 11.95E (±0.83) | 22.22D (±1.45) | 48.49C (±1.44) |
| *Chrysopogan aucheri* | 22.22B (±0.99) | 35.12B (±2.44) | 55.78B (±2.88) |

Values followed by different letters in a column are significantly different at p = 0.05 with (±SE).

**Table S2**. Nutrient contents (mg/kg) of the root powder of selected halophytes. Results are mean of four replicates.

| Metals | Ca | Mg | K |
| --- | --- | --- | --- |
| *Conyzanthus saqumatus* | 46.5d (±2.1) | 54.3c (±3.3) | 39.2c (±1.09) |
| *Solanum surattense* | 53.2c (±2.04) | 70a (±1.59) | 42.7b (±1.49) |
| *Cenchrus ciliaris* | 64.27a (±2.05) | 72.92a (±3.03) | 48.22a (±1.03) |
| *Aerva javanica* | 38e (±1.19) | 30.06d (±1.11) | 35.81d (±1.34) |
| *Peganum harmala* | 61.17a(±1.99) | 68.25b(±2.34) | 40.92b (±1.19) |
| *Chrysopogan aucheri* | 58.23b(±2.07) | 66.61b(±1.19) | 42.66b (±1.69) |

Values followed by different letters in a column are significantly different at p = 0.05 with (±SE).
